# Supplementary material
Source: PubMed Central journal article supplement (PMC1854971)

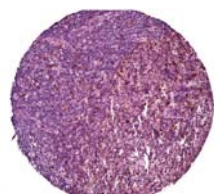

Normal Lymph Node

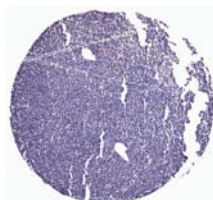

CLL/SLL (-)

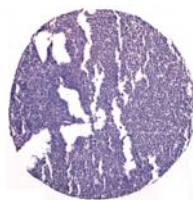

Follicular Lymphoma  
WHO Grade I (-)

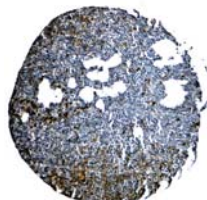

Follicular Lymphoma  
WHO Grade III

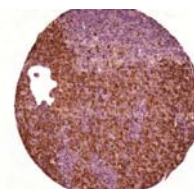

DLBCL

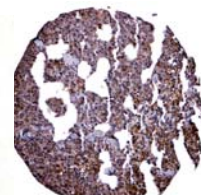

Anaplastic Large  
Cell Lymphoma

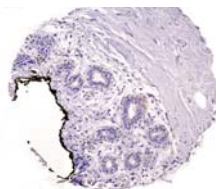

Normal Breast

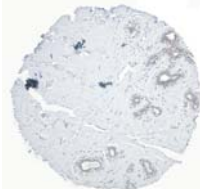

Normal Breast

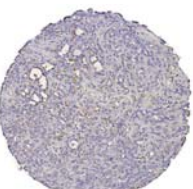

Breast Ductal  
Papilloma

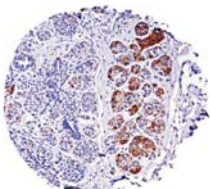

Breast Cancer  
In Situ

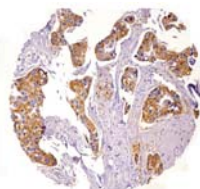

Breast Ductal  
Cancer

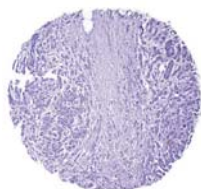

Breast Lobular  
Cancer (-)

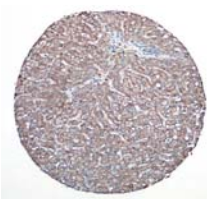

Normal Liver

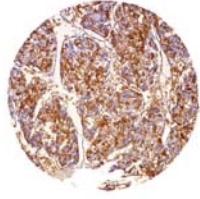

Hepatic Carcinoma

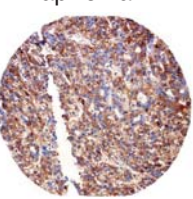

Hepatoblastoma

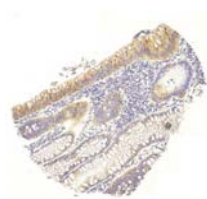

Normal Colon

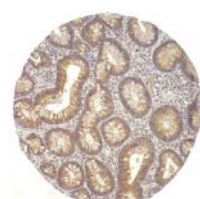

Colon Adenoma

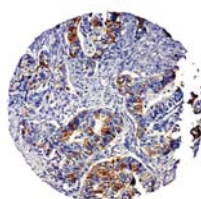

Colon Cancer

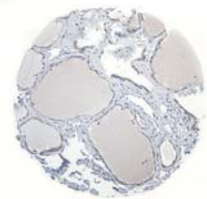

Normal Thyroid

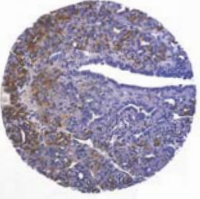

Thyroid Papillary  
Cancer

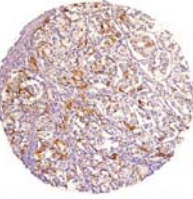

Thyroid Follicular  
Cancer

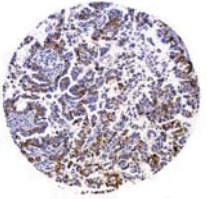

Lung  
Adenocarcinoma

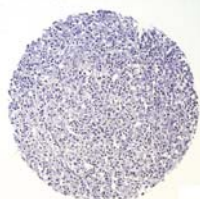

Gastric Cancer (-)

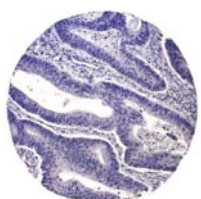

Colon Cancer (-)

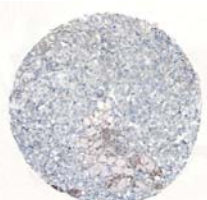

Normal Adrenal

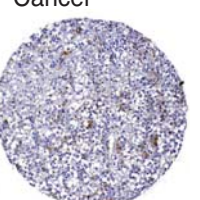

Adrenocortico-  
carcinoma

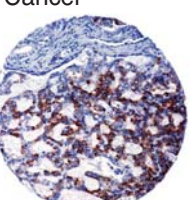

Prostate Cancer

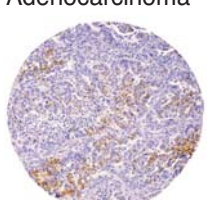

Ovary Endometrial  
Cancer

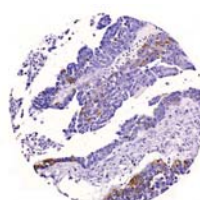

Ovary Papillary  
Serrous Cancer

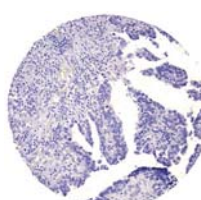

Ovary Papillary  
Serrous Cancer (-)

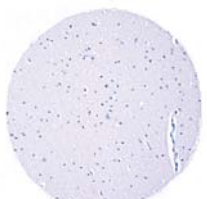

Normal Brain (-)

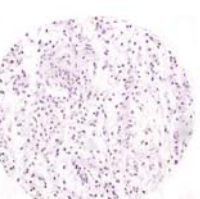

Pilocytic Astrocytoma (-)

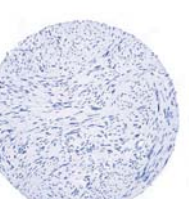

Schwannoma (-)

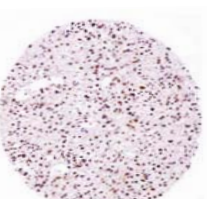

Oligodendroglioma

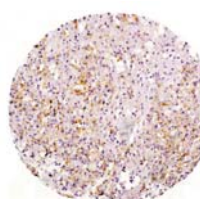

Glioblastoma

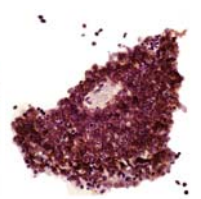

Retinoblastoma



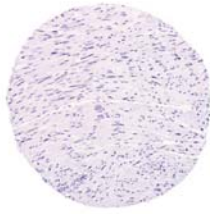

Schwannoma  
Emi1 -

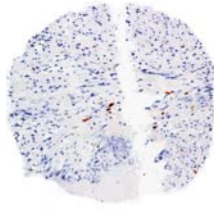

Schwannoma  
Ki67 +

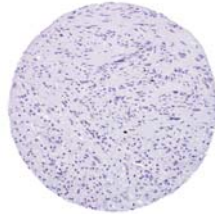

Schwannoma  
Cyclin A rare +

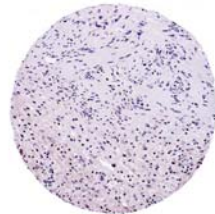

Schwannoma  
Cdh1 -

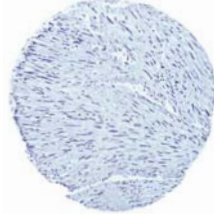

Schwannoma  
Skp2 -

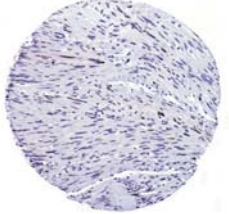

Schwannoma  
p27 +

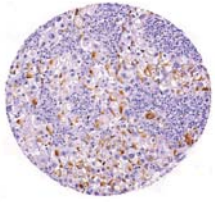

Ovary Clear Cell  
Emi1 +

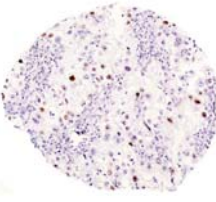

Ovary Clear Cell  
Cyclin E +

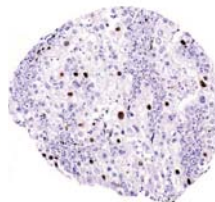

Ovary Clear Cell  
Cyclin A +

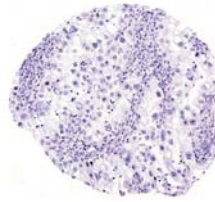

Ovary Clear Cell  
phos-pRb +

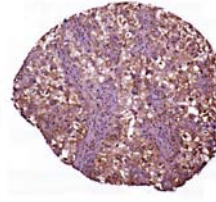

Ovary Clear Cell  
Cdh1 +

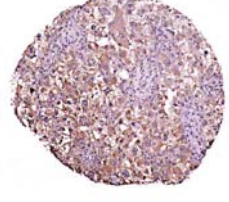

Ovary Clear Cell  
Plk1 +

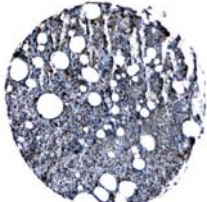

DLBCL  
Emi1 +

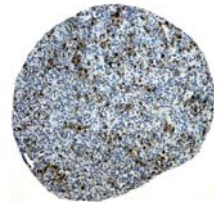

DLBCL  
Securin +

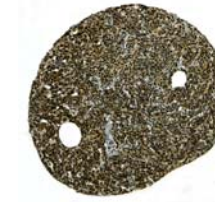

DLBCL  
Cdh1 +

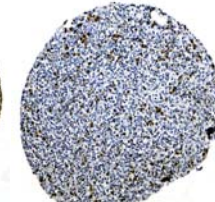

DLBCL  
Cyclin A +

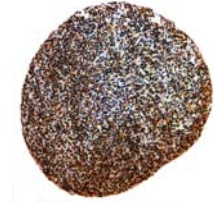

DLBCL  
beta-Catenin +

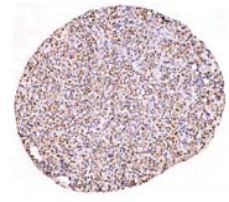

DLBCL  
E2F3 +

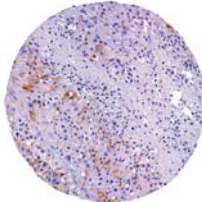

Melanoma  
Emi1 +

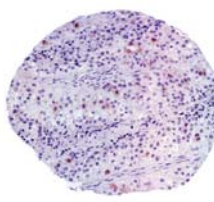

Melanoma  
Aurora A +

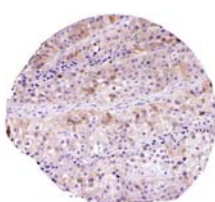

Melanoma  
Securin +

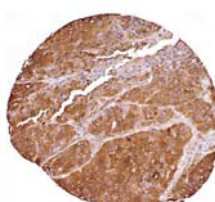

Melanoma  
Cyclin D1 +

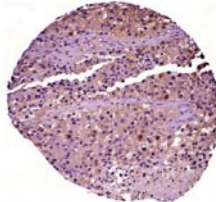

Melanoma  
Cdh1 +

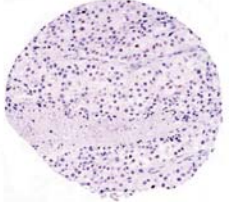

Melanoma  
Cyclin E +

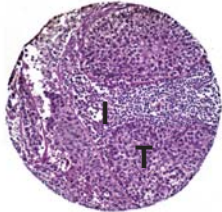

H&E SCC Tumor  
& Inflammation

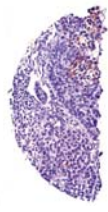

Tumor Emi1 +  
Inflammation -

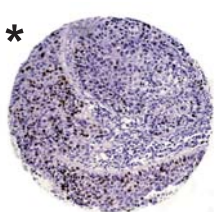

\*  
Tumor Ki67 +  
Inflammation -

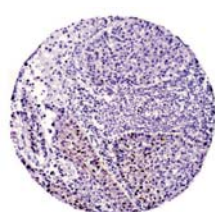

Tumor phos-pRb +  
Inflammation +

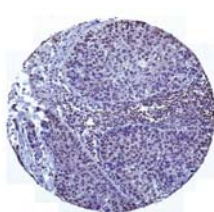

Tumor E2F3 +  
Inflammation +

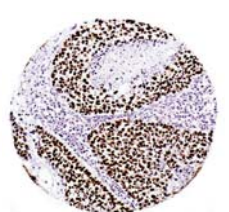

Tumor p53 +  
Inflammation -

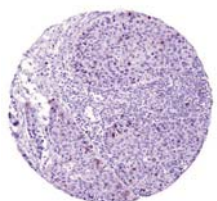

Tumor Cyclin A +  
Inflammation -

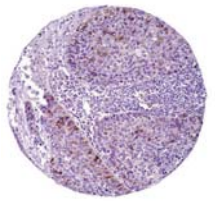

Tumor Securin +  
Inflammation -

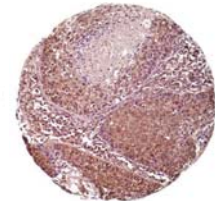

Tumor Plk1 +  
Inflammation +/-

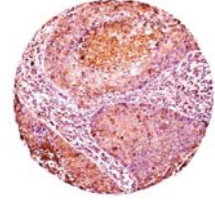

Tumor Cdh1 +  
Inflammation -

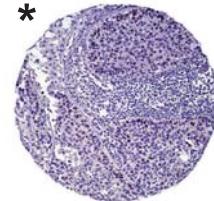

\*  
Tumor Skp2 +  
Inflammation -

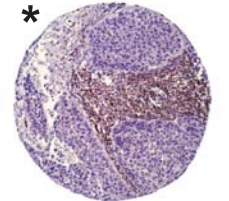

\*  
Tumor p27 -  
Inflammation +

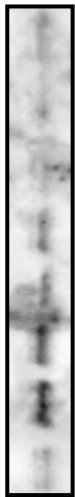

Lung

Colon

Small Intestine

Liver

Kidney

Ovary

Breast

Skeletal Muscle

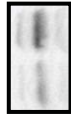

ES-2

SKOV3

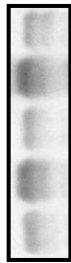

Clear Cell Ovarian Tumors

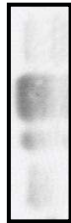

Non-Clear Cell Tumors

### A. Neural TMA

Number of Protein Markers

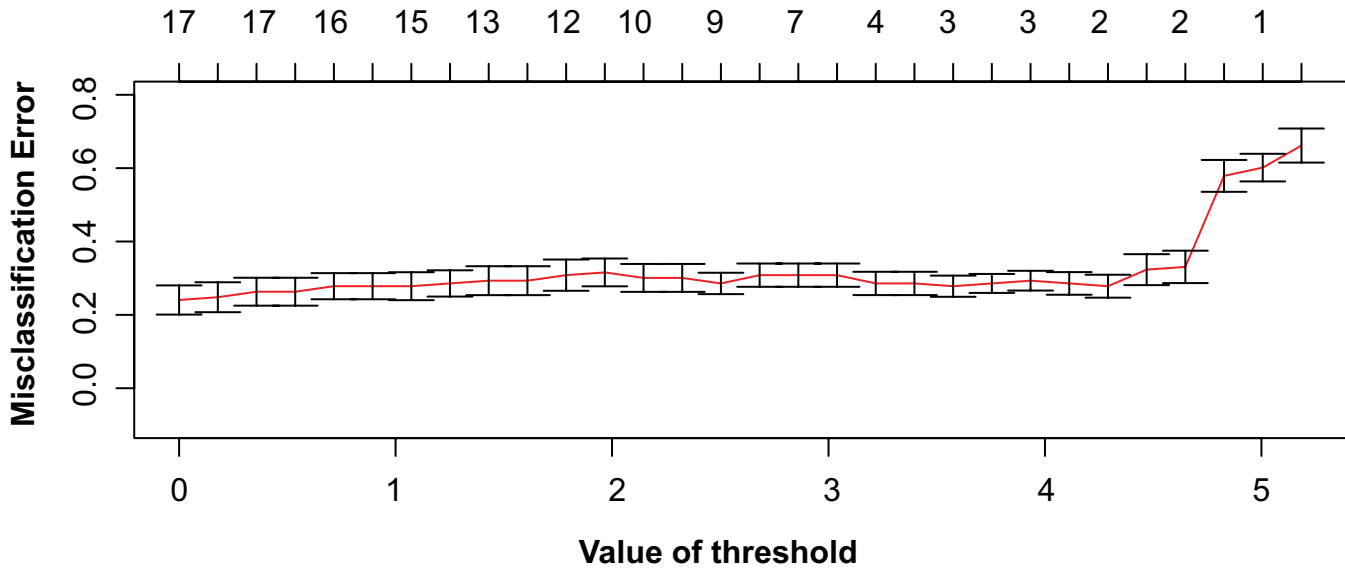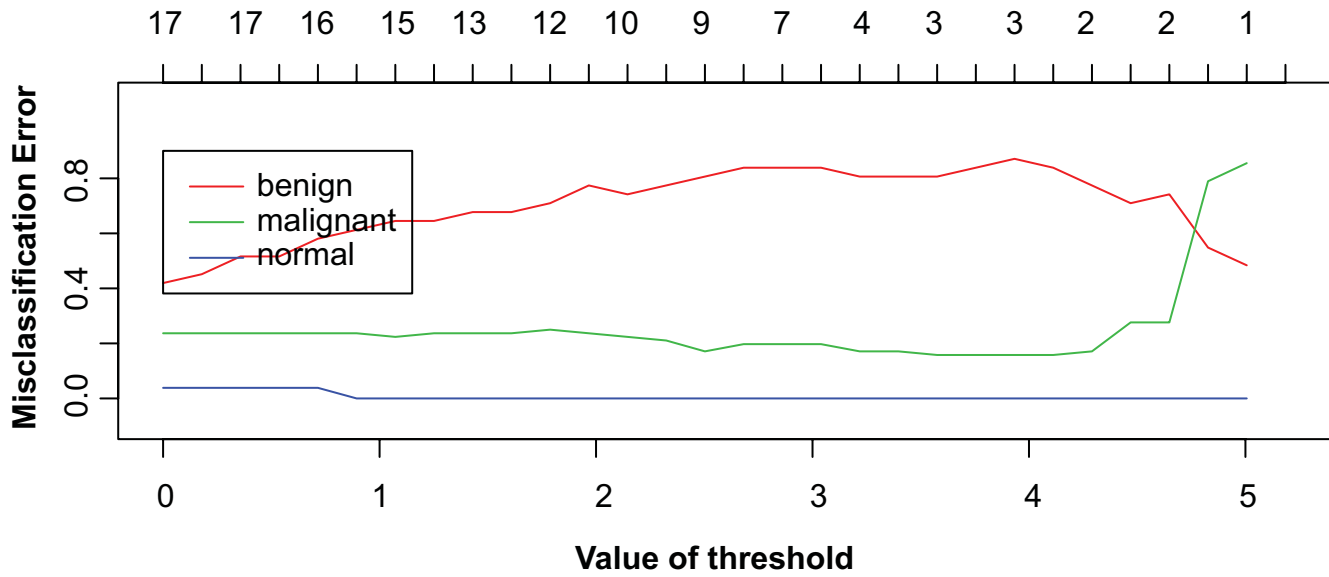

## B. Connective Tissue TMA

Number of Protein Markers

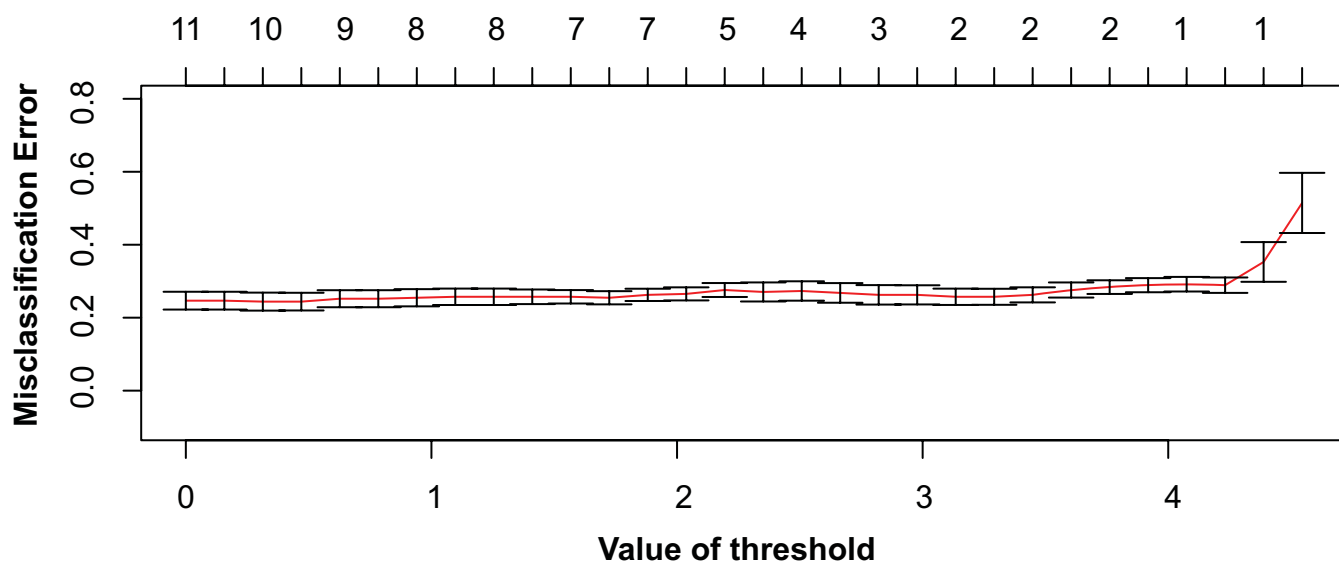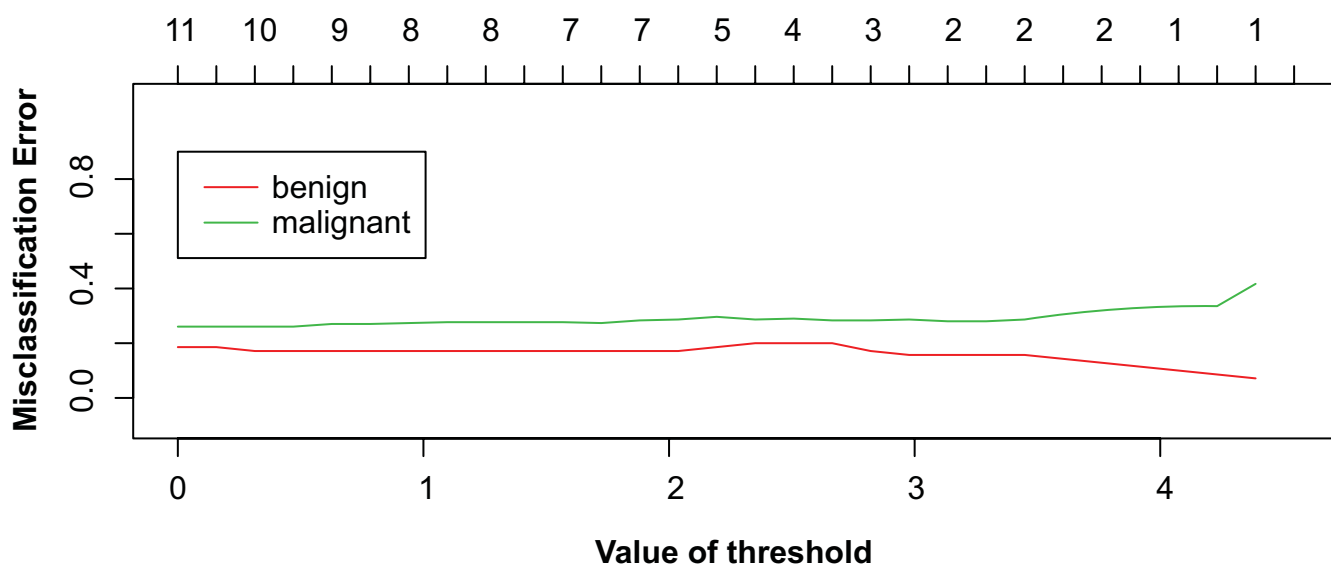

Supplement: amjpathol_170_5_1793__1.pdf [file amjpathol_170_5_1793__1.pdf]
